1 **Article type: Research article**

2

3 **Title: Morphology of immatures of the thelytokous ant, *Monomorium triviale* Wheeler**  
4 **(Formicidae: Myrmicinae: Solenopsidini) with descriptions of the larval caste**  
5 **dimorphism.**

6

7 **Authors:** Naoto Idogawa<sup>1\*</sup>, Ayako Gotoh<sup>2</sup>, and Shigeto Dobata<sup>3</sup>

8

9 **Affiliation:**

10 <sup>1</sup> Laboratory of Insect Ecology, Graduate School of Agriculture, Kyoto University, Kyoto  
11 606-8502, Japan.

12 <sup>2</sup> Department of Biology, Faculty of Science and Engineering and Institute for Integrative  
13 Neurobiology, Konan University, 8-9-1 Okamoto, Higashinada-ku, Kobe, 658-8501, Japan.

14 <sup>3</sup> Department of General Systems Studies, Graduate School of Arts and Sciences, The  
15 University of Tokyo, Komaba, Meguro, Tokyo 153-8902, Japan.

16 \*Corresponding author: E-mail: idogawa.naoto.na@alumni.tsukuba.ac.jp

17

18 **ORCID digit of the author:**

19 Naoto Idogawa: 0000-0003-4055-8204

20 Ayako Gotoh: 0000-0002-2885-9971

21 Shigeto Dobata: 0000-0003-1586-6758

22

23 **Running title:**

24 SPECTACULAR MORPHOLOGY OF QUEEN LARVAE IN A MONOMORIUM ANT (58

25 / 60 words)

26 **Abstract**

27       The ant genus *Monomorium* is one of the most species-rich but taxonomically  
28 problematic groups in the hyperdiverse subfamily Myrmicinae. An East Asian species, *M.*  
29 *triviale* Wheeler, W. M., produces both reproductive queens and sterile workers via obligate  
30 thelytokous parthenogenesis. Here, we describe the immature forms of *M. triviale* based on  
31 light and scanning electron microscopy observations, with a note on the striking caste  
32 dimorphism in the last larval instar. The last-instar queen larvae were easily recognized by  
33 their large size, “aphaenogastroid” body shape, and rows of doorknob-like tubercles on the  
34 lateral and dorsal body surface. This type of queen-specific structure has not been found in  
35 ants in general, let alone congeneric species found in Japan. In stark contrast to the queen  
36 larvae, worker larvae showed a “pheidoroid” body shape and a body surface similar to other  
37 ants. The worker larvae were estimated to have three instars, consistent with previously  
38 described congeners. The pupae of both castes also had no cocoon, a characteristic commonly  
39 described in other Myrmicinae species. In total, the developmental period from egg to adult  
40 worker averaged 59 days under 25°C. We discuss possible functions of the tubercles of queen  
41 larvae based on previous studies.

42 **Keywords:** larval morphology, Pharaoh ant, parthenogenesis, phenotypic plasticity,  
43 protuberance, chaetotaxy

44

## 45 **Introduction**

46           Ants (Hymenoptera: Formicidae) are characterized by the division of labor between  
47 two phenotypes of females: reproductive queens and sterile workers (Hölldobler & Wilson,  
48 1990). These two castes share the same genetic background and diverge epigenetically in  
49 response to socio-environmental factors during immature stages (Trible & Kronauer 2017).  
50 Furthermore, ant larvae play an important role in colony dynamics and physiological  
51 integration by digesting food and distributing nutrients to their nestmates (Dussutour &  
52 Simpson 2009; Schultner *et al.* 2017; Masuko 2019). Such behavior emphasizes the  
53 importance of the morphological study on the immature stages of ants. However, our  
54 knowledge of the immature stages of ants, including number of larval instars, growth rate, and  
55 developmental periods is surprisingly limited. Even for the worker caste, complete larval  
56 descriptions are available in only 0.5% of >13,000 extant species (Bharti *et al.* 2019; Bolton  
57 2021). The reproductive castes, i.e., queens and males, are usually produced in small numbers  
58 during limited seasons, meaning there is even less information on their immature stages.

59           Here, we provide a detailed description of the immature stages of a thelytokous ant,  
60 *Monomorium triviale* Wheeler, with a note on their caste dimorphism. *Monomorium* Mayr is  
61 a globally distributed and speciose genus in the hyperdiverse subfamily Myrmicinae.  
62 Although many species have been transferred to other genera by recent phylogenetic studies  
63 (Ward *et al.* 2014; Sparks *et al.* 2019), approximately 300 species have been described and a  
64 large number of species have yet to be described (Pontieri & Linksvayer 2019). In this genus,  
65 detailed descriptions of larvae are available for only two successful tramp species, the  
66 pharaoh ant, *M. pharaonis* L. (Pontieri *et al.* bioRxiv) and the flower ant, *M. floricola* Jerdon  
67 (Solis *et al.* 2010a). The East Asian species, *M. triviale*, is one of the recently found  
68 parthenogenetic *Monomorium* species (Gotoh *et al.* 2012; Idogawa *et al.* 2021; Ito *et al.* 2021).

69 Males of *M. triviale* have never been reported before, and virgin queens produce both workers  
70 and next-generation queens via thelytoky.

71 In the present study, the number of larval instars of *M. triviale* were estimated based  
72 on the distributional pattern of body size. The morphological features of each larval instar  
73 were also investigated with light and scanning electron microscopy. Additionally, histological  
74 observation was performed on the newly discovered queen-specific structure. Finally, the  
75 developmental period required for each stage was examined by rearing experiments.

## 76 **Materials and Methods**

77 ***Collection of Samples*** The nests of *M. triviale* were collected in a thicket consisting  
78 mostly of deciduous broad-leaved trees located in the northern suburbs of Kyoto, Japan  
79 (35°03'33" N, 135°47'01" E, alt. 90 m) from 2017 to 2021. To obtain all stages of immatures,  
80 the nests were transferred into artificial nests in the laboratory and were kept at 25°C.

81 ***Determination of Larval Instars*** Many previous studies on ant larvae have estimated the  
82 number of larval instars from the size distribution pattern of head capsule width (e.g., Parra &  
83 Haddad 1989). However, Masuko (2017) points out that size-based estimations can overlook  
84 the instars with low abundance (especially the first instar). In the genus *Monomorium*, the  
85 shape and distribution of hairs have been reported to be useful for the identification of larval  
86 instars (Solis *et al.* 2010a). Therefore, we estimated the number of larval instars in *M. triviale*  
87 using a combination of morphometrical and chaetotaxical characteristics.

88 To bracket the lower and upper growth limit of *M. triviale* larvae, we explicitly  
89 identified the individuals belonging to the first and last instar. Sixty-two larvae with egg  
90 chorion (i.e., just after hatching = definitely first instar) were collected from the egg piles in  
91 the nests. Thirty-five prepupae (i.e., just before pupation = definitely last instar) were also  
92 collected. We photographed these larvae under a digital microscope (VHX-900; Keyence) and  
93 measured the maximum head capsule width using ImageJ software (Schneider *et al.* 2012).

94 Then, we measured 582 randomly chosen larvae and plotted the distributional pattern of the  
95 head width in a histogram. The distinct peaks of the histogram were detected to find the  
96 intermediate instars between the first and last instar. At least five individuals representative of  
97 each peak were extracted and morphological differences such as body hair number and type  
98 were examined (see next section). Finally, the number of larval instars was determined on the  
99 consensus of qualitative and quantitative traits. The data calculation and visualization was  
100 performed with R ver. 4.0.0 software (R Core Team 2021).

101 During this experiment, we found worker larvae that were clearly larger than their last  
102 instar larvae. These larvae were reared in the laboratory until their eclosion and confirmed to  
103 be the last instar queen larvae (approx. 50 individuals). We were unable to estimate the  
104 number of larval instars for queens in the above manner because *M. triviale* colonies produce  
105 only a very small number of queen larvae (1–10 individuals) during the early summer.

106 ***Observation of the immature stages*** To characterize the immature stages, the external  
107 morphology was investigated with a binocular microscope (SZ40; OLYMPUS Optical, Tokyo,  
108 Japan), digital microscope (VHX-900; Keyence, Osaka, Japan), and scanning electron  
109 microscope (SEM: VE-8800; Keyence, Osaka, Japan). For the binocular and digital  
110 microscope observations, living immatures were carefully fixed on the slide glasses using  
111 sticky earthquake-resistant gel pads (Seiwa-pro, Osaka, Japan). For the SEM observation,  
112 fresh samples were frozen in a deep freezer at -20°C for 15 min then quickly mounted on the  
113 aluminum stage with conductive carbon double-sided tape. All observations and photography  
114 were performed as soon as possible after sample preparation. Voucher specimens of eggs,  
115 larvae, pupae, and nestmate imagos were deposited in the Laboratory of Insect Ecology,  
116 Kyoto University, Kyoto, Japan. All terminology used in our larval descriptions follows  
117 (Wheeler *et al.* 1976) and (Solis *et al.* 2010a) and measures are given as mean  $\pm$  SD followed

118 by the number ( $n$ ) of observations. For comparison of caste dimorphism, three *Monomorium*  
119 species available in Japan, *M. intrudens* Smith, *M. chinense* Santschi, and *M. hiten* Terayama,  
120 were additionally observed in the same manner.

121 Since we found caste dimorphism in the external morphology of the last instar larvae,  
122 we examined the histological features of the queen larvae. The larvae were fixed in FAA  
123 (pure ethanol:formaldehyde:acetic acid = 16:6:1) for 24 hours and were dehydrated in a  
124 graded ethanol series before embedding in paraffin. They were cut at 4  $\mu\text{m}$  and stained with  
125 hematoxylin and eosin as described in (Gotoh *et al.* 2016). Histological observations were  
126 performed with Leica DM IL LED inverted contrasting microscope and Leica MC 170 HD  
127 camera (Leica Microsystems, Wetzlar, Germany).

128 **Developmental Periods** Rearing experiments were performed to determine the  
129 developmental periods of each immature stage of *M. triviale*. Due to the difficulty in  
130 distinguishing between first and second instar larvae, these stages are grouped as “young  
131 larvae”. From the 18 field-collected source nests, a single queen and 10 nestmate workers  
132 were isolated in an artificial nest for determination of the egg period. The newly oviposited  
133 eggs and hatched larvae were counted daily for approximately 50 days.

134 For determination of the larval and pupal periods, 10 immatures just before the target  
135 stage (i.e., eggs for young larvae period, young larvae for last instar larvae period, last instar  
136 larvae for pupae period) were isolated with 10 workers. The numbers of individuals belonging  
137 to each stage were counted every day. From the 11 field-collected source nests, 7 artificial  
138 nests were prepared for young larvae, 8 nests for last instar larvae, and 7 nests for pupae.  
139 Observations were continued for a maximum of one month until all individuals molted to the  
140 next stage or died. All experimental nests were isolated in the plastic container (36  $\times$  36  $\times$  14  
141 mm) with gypsum on the bottom and were kept in the laboratory at 25°C. The water and food

142 (mealworms, *Tenebrio molitor* L. cut into approximately 5 mm length) was replenished every  
143 3 days.

## 144 **Results**

### 145 **Determination of Larval Instars**

146 The head capsule width of larvae just after hatching (i.e., definitely first instar; mean  
147  $\pm$  SD =  $0.123 \pm 0.007$  mm,  $n = 62$ ) and prepupae (i.e., definitely last instar;  $0.173 \pm 0.006$  mm,  
148  $n = 35$ ) bracket the lower and upper limit of the larval head width. Between these limits, an  
149 intermediate peak was detected around 0.135–0.140 mm in the histogram of larval head width  
150 ( $n = 590$ , bin width = 0.005 mm), suggesting the presence of an additional larval instar.  
151 Furthermore, the number and shape of larval hairs in these three head width ranges were  
152 clearly different; first instar: 100–150 simple smooth hairs, intermediate: 500–600 simple  
153 smooth hairs, last instar: 400–500 anchor-tipped hairs. According to the agreement between  
154 morphometrical and chaetotaxical features, we estimated that there are three instars of *M.*  
155 *triviale* worker larvae (Table 1). The larval head width of first ( $0.122 \pm 0.006$  mm, range:  
156 0.107–0.137 mm,  $n = 84$ ), second ( $0.137 \pm 0.006$  mm, range: 0.124–0.152 mm,  $n = 226$ ) and  
157 third ( $0.175 \pm 0.008$  mm, range: 0.146–0.191 mm,  $n = 116$ ) instar larvae overlapped (Fig. 1).  
158 The average growth rate between the larval instars was 1.20 (1.12 between the first and  
159 second instars; 1.27 between the second and third instars).

160

### 161 **Description of the immatures of *M. triviale***

#### 162 **Egg**

163 The egg is oval in profile and presents a whitish translucent chorion (Fig. 2A). Length  $0.31 \pm$   
164  $0.02$  mm, range 0.24–0.35 mm, width  $0.19 \pm 0.01$  mm, range 0.16–0.22 mm (all  $n = 183$ ). The  
165 length:width ratio for the species is 1.62 on average.

166

167

168 **First instar**

169 **Body:** Whitish, profile “pheidoloid” *sensu* Wheeler & Wheeler (1976) which is characterized  
170 by short and straight abdomen, short prothorax, and ends rounded to ventral direction (Fig.  
171 2B); distinct anterior somites; head subcircular; anus subterminal (Fig. 2C). Body  $0.328 \pm$   
172  $0.036$  mm long ( $0.237$ – $0.416$  mm),  $0.161 \pm 0.014$  mm wide ( $0.123$ – $0.20$  mm,  $n = 84$ ). Length  
173 through spiracles  $0.44 \pm 0.34$  mm ( $n = 6$ ). Body hair (varying 100–150 in number;  $n = 5$ )  
174 unbranched,  $8.4 \pm 2.0$   $\mu\text{m}$  long ( $n = 25$  of 5 individuals), distance between two adjacent hairs  
175  $25.6 \pm 9.1$   $\mu\text{m}$  ( $n = 25$  from 5 individuals, Fig. 2D). Body with 10 spiracles; distance between  
176 two spiracles  $29.2 \pm 9.0$   $\mu\text{m}$  ( $n = 5$ ). Spiracle opening unornamented; diameter of the first  
177 spiracle  $0.8 \pm 0.3$ , other spiracles  $0.5 \pm 0.2$   $\mu\text{m}$  ( $n = 5$ ).

178 **Head capsule:** Cranium subcircular shaped,  $0.125 \pm 0.011$  mm in height ( $0.091$ – $0.149$  mm),  
179  $0.122 \pm 0.006$  mm in width ( $0.107$ – $0.137$  mm,  $n = 84$ ); cranium index =  $102.3 \pm 9.6$ . Head  
180 surface smooth with 26 unbranched hairs: 4 along the ventral border of the clypeus; 12 hairs  
181 on each gena; 4 on frons; 2 on vertex; and 4 along the occipital border. Length of hairs;  $8.7 \pm$   
182  $1.9$   $\mu\text{m}$  ( $n = 25$  of 5 individuals).

183 **Mouthparts:** Clypeus clearly defined, with no sensilla (Fig. 2E); labrum bilobed,  $62.1 \pm 1.7$   
184  $\mu\text{m}$  wide ( $n = 5$ ), with six sensilla on the anterior surface. Maxilla conoidal in shape,  $36.1 \pm$   
185  $2.1$   $\mu\text{m}$  in width ( $n = 10$ ). Galea digitiform culminating with two sensilla. Maxillary palpus  
186 skewed peg with two sensilla. Labium elliptical,  $52.3 \pm 2.8$   $\mu\text{m}$  wide ( $n = 5$ ). Labial palpus  
187 digitiform with a sensillum on the top.

188

189 **Second instar**



190 **Body:** Whitish, profile pheidoloid in shape (Fig. 3A); distinct anterior somites; head  
191 subcircular; anus subterminal (Fig. 3B). Body about  $0.459 \pm 0.074$  mm long (0.281–0.593  
192 mm),  $0.189 \pm 0.021$  mm wide (0.149–0.250 mm,  $n = 226$ ). Length through spiracles  $0.77 \pm$   
193  $0.18$  mm ( $n = 5$ ). Body hair (varying 500–600 in number;  $n = 5$ ) unbranched,  $6.8 \pm 2.0$   $\mu\text{m}$   
194 long ( $n = 25$  of 5 individuals), distance between two adjacent hairs  $13.8 \pm 2.9$   $\mu\text{m}$  ( $n = 25$   
195 from 5 individuals, Fig. 3C). Body with 10 spiracles; distance between two spiracles  $46.8 \pm$   
196  $4.8$   $\mu\text{m}$  ( $n = 5$ ). Spiracle opening unornamented; diameter of the first spiracle  $2.1 \pm 0.3$ , other  
197 spiracles  $0.6 \pm 0.1$   $\mu\text{m}$  ( $n = 5$ ).

198 **Head capsule:** Cranium subcircular shaped,  $0.146 \pm 0.016$  mm in height (0.108– 0.189 mm),  
199  $0.137 \pm 0.006$  mm in width (0.124–0.152 mm,  $n = 226$ ); cranium index =  $106.4 \pm 10.5$ . Head  
200 surface smooth with 26 unbranched hairs: 4 along the ventral border of the clypeus; 12 hairs  
201 on each gena; 4 on frons; 2 on vertex; and 4 along the occipital border. Length of hairs;  $12.9 \pm$   
202  $3.3$   $\mu\text{m}$  ( $n = 25$  of 5 individuals).

203 **Mouthparts:** Clypeus clearly defined, with no sensilla; Labrum bilobed,  $67.3 \pm 1.3$   $\mu\text{m}$  wide  
204 ( $n = 5$ , Fig. 3D), with six sensilla on the anterior surface. Maxilla conoidal in shape,  $40.1 \pm$   
205  $1.6$   $\mu\text{m}$  in width ( $n = 8$ ). Galea digitiform culminating with two sensilla. Maxillary palpus  
206 skewed peg with two sensilla. Labium elliptical,  $51.5 \pm 2.5$   $\mu\text{m}$  wide ( $n = 5$ ). Labial palpus  
207 digitiform with a sensillum on the top.

208

### 209 **Third instar**

210 **Body:** Whitish, profile pheidoloid in shape (Fig. 4A); distinct anterior somites (Fig. 4B); head  
211 subcircular (Fig. 4C); anus subterminal. Body about  $0.847 \pm 0.192$  mm long (0.414–1.20 mm),  
212  $0.360 \pm 0.087$  mm wide (0.192–0.608 mm,  $n = 164$ ). Length through spiracles  $0.95 \pm 0.05$   
213 mm ( $n = 5$ ). Body hair (varying 400–500 in number;  $n = 5$ ) deeply branched,  $32.5 \pm 4.4$   $\mu\text{m}$   
214 long ( $n = 25$  of 5 individuals), distance between two adjacent hairs  $26.4 \pm 5.3$   $\mu\text{m}$  ( $n = 25$

215 from 5 individuals, Fig. 4D). Body with 10 spiracles; distance between two spiracles  $57.8 \pm$   
216  $9.2 \mu\text{m}$  ( $n = 5$ ). Spiracle opening unornamented; diameter of the first spiracle  $2.2 \pm 0.4$ , other  
217 spiracles  $0.7 \pm 0.2 \mu\text{m}$  ( $n = 5$ , Fig. 4E).

218 **Head capsule:** Cranium subcircular shaped,  $0.189 \pm 0.017$  mm in height (0.134–0.227 mm),  
219  $0.175 \pm 0.008$  mm in width (0.146–0.191 mm,  $n = 164$ ); cranium index =  $108.3 \pm 8.0$ . Head  
220 surface smooth with Twenty-six branched hairs: 4 along the ventral border of the clypeus; 12  
221 hairs on each gena; 4 on frons; 2 on vertex; and 4 along the occipital border. Length of hairs;  
222  $29.1 \pm 4.7 \mu\text{m}$  ( $n = 25$  of 5 individuals).

223 **Mouthparts:** Clypeus clearly defined, with no sensilla (Fig. 4D); Labrum bilobed,  $65.5 \pm 1.3$   
224  $\mu\text{m}$  wide ( $n = 5$ ), with six sensilla on the anterior surface. Mandibles ‘ectatommoid’ as  
225 defined by Wheeler & Wheeler (1976): “Subtriangular; with a medial blade arising from the  
226 anterior surface and bearing one or two medial teeth; apex curved medially to form a tooth” in  
227 shape, with three teeth, 0.060–0.067 mm long ( $n = 2$ ). Maxilla conoidal in shape,  $46.9 \pm 1.2$   
228  $\mu\text{m}$  in width ( $n = 8$ ). Galea digitiform culminating with two sensilla. Maxillary palpus skewed  
229 peg with two sensilla. Labium elliptical,  $55.5 \pm 4.2 \mu\text{m}$  wide ( $n = 5$ ). Labial palpus digitiform  
230 with a sensillum on the top.

231

### 232 **Last instar queen**

233 **Body:** Whitish, profile “aphaenogastroid” *sensu* Wheeler & Wheeler (1976) which is  
234 characterized by constriction between thorax and abdomen (Fig. 5A); distinct anterior  
235 somites; head subcircular; anus subterminal (Fig. 5B). Body about  $1.756 \pm 0.329$  mm long  
236 (0.742–2.291 mm),  $0.873 \pm 0.194$  mm wide (0.408–1.214 mm,  $n = 116$ ). Length through  
237 spiracles 1.8–2.1 mm ( $n = 2$ ). Abdominal somites hairless (Fig 5A-C), prothoracic body hair  
238 (varying 50–70 in number;  $n = 2$ ) unbranched,  $52.8 \pm 14.9 \mu\text{m}$  long ( $n = 20$  of 2 individuals,  
239 Fig. 5D, E), distance between two adjacent hairs  $25.3 \pm 5.9 \mu\text{m}$  ( $n = 20$  from 2 individuals).

240 Body with 10 spiracles; distance between two spiracles 118.5–213.4  $\mu\text{m}$  ( $n = 1$ ). Spiracle  
241 opening unornamented; diameter of the first spiracle 2.7–3.1, other spiracles 1.3–1.8  $\mu\text{m}$  ( $n =$   
242 2).

243 **Head capsule:** Cranium subcircular shaped (Fig. 5D),  $0.194 \pm 0.027$  mm in height (0.096–  
244 0.256 mm),  $0.187 \pm 0.013$  mm in width (0.16–0.220 mm,  $n = 116$ ); cranium index =  $103.9 \pm$   
245 12.7. Head surface smooth with Twenty-six unbranched hairs: 4 along the ventral border of  
246 the clypeus; 12 hairs on each gena; 4 on frons; 2 on vertex; and 4 along the occipital border.  
247 Length of hairs;  $28.3 \pm 9.3$   $\mu\text{m}$  ( $n = 20$  of 2 individuals).

248 **Mouthparts:** Clypeus clearly defined, with no sensilla; Labrum bilobed,  $77.5 \pm 2.2$   $\mu\text{m}$  wide  
249 ( $n = 5$ ), with six sensilla on the anterior surface. Mandibles ectatomoid in shape, with 3  
250 teeth, 0.069–0.070 mm long ( $n = 2$ ). Maxilla conoidal in shape,  $51.8 \pm 3.4$   $\mu\text{m}$  in width ( $n = 8$ ).  
251 Galea digitiform culminating with two sensilla. Maxillary palpus skewed peg with two  
252 sensilla. Labium elliptical,  $59.1 \pm 2.2$   $\mu\text{m}$  wide ( $n = 5$ ). Labial palpus digitiform with a  
253 sensillum on the top.

254 **Protuberances:** Total 37 protuberances; 9 pairs on dorsal, 6 pairs on lateral and unpaired 7  
255 on mid-ventral (Table 2). Paired doorknob-like dorsal tubercles on 2–3rd thoracic and 1–4th  
256 abdominal somites,  $72.3 \pm 9.4$   $\mu\text{m}$  diameter,  $134.0 \pm 52.7$   $\mu\text{m}$  long ( $n = 12$ ). Lateral doorknob-  
257 like tubercles on 2–3rd thoracic and 1–7th abdominal somites,  $73.4 \pm 9.9$   $\mu\text{m}$  diameter,  $103.7$   
258  $\pm 33.9$   $\mu\text{m}$  long ( $n = 36$ ). Ventral protuberances “bosses” as defined by Wheeler & Wheeler  
259 (1976); “an elevated structure with a rounded terminus” in shape. Anterior four bosses on the  
260 3rd thoracic and 1–3rd abdominal somites clearly defined by outlines,  $260.7 \pm 95.0$   $\mu\text{m}$  wide,  
261  $105.4 \pm 40.5$   $\mu\text{m}$  long,  $116.5 \pm 35.9$   $\mu\text{m}$  high ( $n = 8$ ). Posterior three bosses on the 4–6th  
262 abdominal somites slightly raised from body without distinct border. All protuberances  
263 surface uneven with minute papillae (Fig. 5F, G). We did not find any opening or duct-like  
264 structures on the surface of protuberances.

265

## 266 **Pupae**

267 Exarate, with no cocoon, 0.99–1.12 mm long in workers ( $n = 10$ , Fig. 6A) and 2.20–2.49 mm  
268 in queens ( $n = 2$ , Fig. 6B), milky-white when young; eyes becoming black and body gradually  
269 darkened to a yellowish-brown as they develop into imagos. Queen wings vestigial (i.e.,  
270 brachypterous, Fig. 6C).

271

## 272 **Caste dimorphism in congeneric species**

273 The last instar larvae of the three observed *Monomorium* species, *M. hiten*, *M.*  
274 *intrudens* and *M. chinense* shared distinct anterior somites, subcircular head shape and  
275 subterminal anus. The worker larvae of all three species indicated the pheidoroid shape in  
276 profile and were covered with anchor-shaped hairs on the thoracic and abdominal somites  
277 (Fig. 7A–C). In *M. hiten*, the larvae of reproductive males and females (= queens) also had  
278 pheidoroid shape (Fig. 7D). However, in *M. intrudens* (Fig. 7E) and *M. chinense* (Fig. 7F),  
279 the reproductive larvae indicated “attoid” shape as defined by Wheeler & Wheeler (1976);  
280 “diameter approximately equal to distance from labium to anus” in profile. The anchor-  
281 shaped hairs were not found in the reproductive larvae of all three species.

282

## 283 **Internal morphology of last instar queen larvae**

284 Histological observations of the queen larva showed that the dorsal and lateral  
285 doorknob-like tubercles (Fig. 8A, B) and ventral bosses (Fig. 8C, D) were formed by  
286 extended epidermis and cuticle. There are no muscles or innervation inside the dorsal and  
287 lateral tubercles and ventral bosses. The thickness of the cuticle and epidermis was  $8.6 \pm 1.8$   
288  $\mu\text{m}$  ( $n = 7$ ) and  $11.6 \pm 3.3 \mu\text{m}$  ( $n = 7$ ) in the doorknob-like tubercles, two times thicker than  
289 the other part of the larval body, which was  $4.2 \pm 0.2 \mu\text{m}$  ( $n = 9$ ) and  $4.9 \pm 1.0 \mu\text{m}$  ( $n = 9$ ).

290 The ventral bosses were formed by slightly thicker cuticle  $5.78 \pm 1.11 \mu\text{m}$  ( $n = 5$ ) and  
291 markedly thicker epidermis  $16.42 \pm 4.09 \mu\text{m}$  ( $n = 5$ ). In the ventral bosses, the small cells  
292 (possibly fat bodies) surrounded by epidermis were observed (Fig. 8D). We did not find any  
293 specialized cells and duct-like structures in the doorknob-like tubercles and in the ventral  
294 bosses.

295

## 296 **Developmental periods**

297 During the 53-day experimental period, 211 eggs and 166 first instar larvae appeared  
298 in the artificial nests (Table 3). The average duration between oviposition and hatching was  
299  $13.39 \pm 2.28$  days. Out of 70 induced eggs, 32 young (= first and second instar) larvae  
300 hatched and all successfully turned into the last instar larvae in an average of  $7.31 \pm 1.00$  days.  
301 Seventy-two of 80 induced young larvae molted to the last instar larvae and 51 of them turned  
302 into prepupae in  $18.31 \pm 3.29$  days, and all molted to pupae in  $4.43 \pm 1.10$  days. Thirty-three  
303 of 70 induced last instar larvae turned to pupae and 22 individuals successfully emerged as  
304 worker imago in  $16.87 \pm 1.55$  days. In total, the overall developmental period of *M. triviale*  
305 worker was estimated to be 59 days.

306

## 307 **Discussion**

308 Based on the combination of the body size and body hair features, three larval instars  
309 were estimated for *M. triviale*. This is the lowest number of larval instars in Formicidae  
310 reported from four subfamilies; Dolyrinae, Ectatomminae, Formicinae and Myrmicinae (Solis  
311 *et al.* 2010a). In Myrmicinae, three larval instars were known from 16 species including the  
312 congeners, *M. pharaonis* and *M. floricola* (Solis *et al.* 2010a; Bharti & Gill 2011; Bharti *et al.*  
313 2019). In *M. triviale*, calculated growth rates between the instars are consistent with the Dyar  
314 principle of a constant ratio of growth by molting between 1.1 and 1.9 (Parra & Haddad,

315 1989). The growth rate during the larval period of *M. triviale* was 1.19, which is smaller than  
316 that of *M. floricola* (1.23; Solis *et al.* 2010) and *M. pharaonis* (1.36; Alvares *et al.* 1993). This  
317 difference may reflect the difference in body size of adult workers, ca. 1.5 mm for *M. triviale*,  
318 1.7–2.0 mm for *M. floricola* (Wetteler 2010b), and 2.2–2.4 mm for *M. pharaonis* (Wetterer  
319 2010a).

320 The total developmental period of *M. triviale* was estimated to be about 59 days (egg:  
321 13 days + larva: 29 days + pupa: 17 days). These results are slightly longer than those of the  
322 tropical congeners *M. pharaonis* (egg: 11 days + larva: 22 days + pupa: 12 days, 27°C;  
323 Pontieri *et al.* bioRxiv) and *M. hiten* (egg: 12 days + larva: 17 days + pupa: 20 days, 24°C; Ito  
324 *et al.* 2021). It should be noted that the larval period of *M. triviale* may be extended under  
325 natural conditions because the larvae can stop their development and overwinter in the  
326 temperate zone of Japan.

327 Adams *et al.* (2021) suggested that the combination of quantitative and binary traits is  
328 effective in distinguishing the sex and caste of ant larvae. Our results showed that this  
329 approach is also viable in *M. triviale*. Although the body size of each larval instar overlapped  
330 (Fig.1), three larval instars could be separated by the number and shape of their body hairs  
331 (Table 1). The larvae of some *Monomorium* species have deeply branched anchor-shaped  
332 hairs (Solis *et al.* 2010a; Penick *et al.* 2012). In *M. triviale*, the third instar worker larvae  
333 possess these anchor-shaped hairs all over their body. On the other hand, the last instar larvae  
334 of the queen have very few simple hairs only on the prothorax. Moreover, the three  
335 congeneric species *M. intrudens*, *M. hiten* and *M. chinense* also showed the same caste-  
336 specific pattern: worker larvae had branched hairs, but reproductive larvae were almost  
337 hairless. Such caste dimorphism of body hairs was previously known in *M. minimum*  
338 (Wheeler & Wheeler 1955) and *M. pharaonis* (Edwards 1991). The absence of anchor-tipped

339 hairs on the last instar could be a useful trait to distinguish the reproductive larvae of  
340 *Monomorium* species.

341 The caste dimorphism in the last larval instar of *M. triviale* is more striking than in  
342 other observed congeneric species. The queen larvae of *M. triviale* have "aphaenogastroid"  
343 shape in profile, the lateral and dorsal rows of doorknob-like tubercles on thoracic and  
344 abdominal segments and semi-elliptical protrusion on ventral abdominal segments. Unusual  
345 forms of ant larvae have been described from diverse subfamilies (Table 4). In the  
346 Myrmicinae, the caste dimorphism similar to that in *M. triviale* has been reported in  
347 *Crematogaster* species. Some late-instar larvae of *C. riva* var. *luctuosa* and *C. scutellaris*  
348 have rows of lateral protuberances on the abdominal segments (Menozzi 1930; Eidmann  
349 1926), and it is speculated that these larvae differentiate into queens (Casevitz-Weulersse  
350 1984). Contrastingly, in some genera of Dolichoderinae, protuberances have been found only  
351 on worker larvae (e. g. Solis *et al.* 2010b).

352 Wheeler & Wheeler (1976) proposed five possible functions of protuberances in the  
353 ant larvae: (1) support of the body position and direction (2) defense against cannibalism  
354 among larvae (3) attachments to ceilings and walls of the nest (4) organs for trophallaxis with  
355 adult workers (5) structures for holding food on the body surface. These hypotheses have not  
356 been sufficiently tested, with only a few exceptions such as Masuko (2019) and Fox *et al.*  
357 (2017). Our morphological and histological observations could not find any specialized  
358 structures such as duct-like openings and secretory cells in the protuberances of *M. triviale*  
359 queen larvae. As in many other cases, the function of queen-specific tubercles of the *M.*  
360 *triviale* larvae is still unclear at this time. Further examination of the function of these unusual  
361 structures will help us understand the hidden but essential roles larvae play in complex ant  
362 societies.

363

364 **Acknowledgments**

365 We are grateful to Kenji Matsuura who allowed us to use his laboratory. We thank  
366 Fuminori Ito for providing his *M. hiten* nest, Tomoya Kamada for his help during histological  
367 observation, and Matthew Kamiyama for his English corrections of this manuscript. Finally,  
368 we also thank Christian Peeters and Keiichi Masuko for their valuable comments on larval  
369 protuberances. This work was supported by a Japan Society for the Promotion of Science  
370 (JSPS) Research Fellowship for Young Scientists to NI (19J22242), JSPS KAKENHI Grant  
371 Number JP20K06080 to AG and a grant from the Secom Science and Technology Foundation  
372 to SD.

373



374 **References**

- 375 Adams, R.M.M., Larsen, R.S., Stylianidi, N., Cheung, D., Qiu, B., Murray, S.K., Zhang, G. &  
376 Boomsma, J.J. (2021) Hairs distinguish castes and sexes: identifying the early  
377 ontogenetic building blocks of a fungus-farming superorganism (Hymenoptera:  
378 Formicidae). *Myrmecological News*, 31, 201-216.  
379 [https://doi.org/10.25849/MYRMECOL.NEWS\\_031:201](https://doi.org/10.25849/MYRMECOL.NEWS_031:201)
- 380 Alvares, L.E., Bueno, O.C. & Fowler, H.G. (1993) Larval instars and immature development  
381 of a Brazilian population of pharaoh's ant, *Monomorium pharaonis* (L.) (Hym.,  
382 Formicidae). *Journal of Applied Entomology*, 116, 90–93.  
383 <https://doi.org/10.1111/j.1439-0418.1993.tb01171.x>
- 384 Bharti, H. & Gill, A. (2011) SEM studies on immature stages of *Pheidole indica* Mayr, 1879  
385 (Hymenoptera: Formicidae) from India. *Halteres*, 3, 38–44.
- 386 Bharti, H., Kaur, P. & Bharti, M. (2019) Description of the ant larvae of two species of the  
387 genus *Myrmica* Latreille, 1804 (Hymenoptera: Formicidae) from Indian Himalayas.  
388 *Asian Myrmecology*, 11, e011004  
389 <https://doi.org/10.20362/am.011004>
- 390 Bolton, B. (2021) An online catalog of the ants of the world. Available from: <http://antcat.org>  
391 (accessed 31 October 2021)
- 392 Casevitz-Weulersse, J. (1984) Les larves à expansions latérales de *Crematogaster*  
393 (*Acrocoelia*) *scutellaris* (Olivier) (Hym. Formicidae). *Actes des Colloques Insectes*  
394 *Sociaux*, 1, 131–138.
- 395 Dussutour, A. & Simpson, S.J. (2009) Communal nutrition in ants. *Current Biology*, 19, 740–  
396 744.  
397 <https://doi.org/10.1016/j.cub.2009.03.015>

- 398 Edwards, J.P. (1991) Caste regulation in the pharaoh's ant *Monomorium pharaonis*:  
399 recognition and cannibalism of sexual brood by workers. *Physiological Entomology* 16,  
400 263–271.  
401 <https://doi.org/10.1111/j.1365-3032.1991.tb00565.x>
- 402 Eidmann, H. (1926) Die ameisenfauna der balearen. *Zoomorphology*, 6, 694–742.  
403 <https://doi.org/10.1007/BF00409039>
- 404 Fox, E.G.P., Smith, A.A., Gibson, J.C. & Solis, D.R. (2017) Larvae of trap-jaw ants,  
405 *Odontomachus* LATREILLE, 1804 (Hymenoptera: Formicidae): morphology and  
406 biological notes. *Myrmecological News*, 25, 17–28.  
407 [https://doi.org/10.25849/myrmecol.news\\_025:017](https://doi.org/10.25849/myrmecol.news_025:017)
- 408 Gotoh, A., Billen, J., Hashim, R. & Ito, F. (2016) Degeneration patterns of the worker  
409 spermatheca during morphogenesis in ants (Hymenoptera: Formicidae). *Evolution &*  
410 *development*, 18, 96–104.  
411 <https://doi.org/10.1111/ede.12182>
- 412 Gotoh, A., Billen, J., Tsuji, K., Sasaki, T. & Ito, F. (2012) Histological study of the  
413 spermatheca in three thelytokous parthenogenetic ant species, *Pristomyrmex punctatus*,  
414 *Pyramica membranifera* and *Monomorium triviale* (Hymenoptera: Formicidae). *Acta*  
415 *zoologica*, 93, 200–207.  
416 <https://doi.org/10.1111/j.1463-6395.2010.00498.x>
- 417 Hölldobler, B. & Wilson, E.O. (1990) *The Ants*, Harvard University Press, Cambridge, xii +  
418 732 pp.
- 419 Idogawa, N., Sasaki, T., Tsuji, K. & Dobata, S. (2021) Comprehensive analysis of male-free  
420 reproduction in *Monomorium triviale* (Formicidae: Myrmicinae). *PLOS ONE*, 16(4),  
421 e0246710.  
422 <https://doi.org/10.1371/journal.pone.0246710>

- 423 Ito, F., Makita, S., Nakao, H., Hosokawa, R., Kikuchi, T. & Yamane, S. Thelytokous  
424 parthenogenesis by dealate queens in the myrmicine ant *Monomorium hiten* distributed  
425 in Nansei Islands, western Japan, with description of the male. *Asian Myrmecology*, 14,  
426 e014001.  
427 <https://doi.org/10.20362/am.014001>
- 428 Masuko, K. (1989) Larval hemolymph feeding in the ant *Leptanilla japonica* by use of a  
429 specialized duct organ, the “larval hemolymph tap” (Hymenoptera: Formicidae).  
430 *Behavioral Ecology and Sociobiology*, 24, 127–132.  
431 <https://doi.org/10.1007/BF00299644>
- 432 Masuko, K. (2017) Larval instars of the ant *Strumigenys solifontis* Brown (Hymenoptera:  
433 Formicidae): the fallacy of size distribution. *Journal of natural history*, 51, 115–126.  
434 <https://dx.doi.org/10.1080/00222933.2016.1254299>
- 435 Masuko, K. (2019) Larval hemolymph feeding and hemolymph taps in the ant *Proceratium*  
436 *itoi* (Hymenoptera: Formicidae). *Myrmecological News*, 29, 21-34.  
437 [https://doi.org/10.25849/myrmecol.news\\_029:021](https://doi.org/10.25849/myrmecol.news_029:021)
- 438 Menozzi, C. (1930) Formiche della Somalia italiana meridionale. *Memorie della Società*  
439 *Entomologica Italiana* 9, 76–130.
- 440 Parra, J.R.P. & Haddad, G.M.L. (1989) Determinação do número de instares de insetos.  
441 *Piracicaba, Fundação de Estudos. Agrários Luiz de Queiroz*, 49 p.
- 442 Peeters, C. & Hölldobler, B. (1992) Notes on the morphology of the sticky “doorknobs” of  
443 larvae in an Australian *Hypoponera* sp. (Formicidae; Ponerinae). *Psyche; a journal of*  
444 *entomology*, 99, 23–30.  
445 <https://doi.org/10.1155/1992/96238>
- 446 Penick, C.A., Copple, R.N., Mendez, R.A. & Smith, A.A. (2012) The role of anchor-tipped  
447 larval hairs in the organization of ant colonies. *PLOS ONE*, 7, e41595.

- 448 <https://doi.org/10.1371/journal.pone.0041595>
- 449 Petralia, R.S. & Vinson, S.B. (1979) Comparative anatomy of the ventral region of ant larvae,  
450 and its relation to feeding behavior. *Psyche; a journal of entomology* 86, 375–394.
- 451 <https://doi.org/10.1155/1979/70316>
- 452 Pontieri, L. & Linksvayer, T.A. (2019) *Monomorium*. In: Encyclopedia of Social Insects.  
453 Springer International Publishing, Cham, pp. 1–6.
- 454 [https://doi.org/10.1007/978-3-319-90306-4\\_171-1](https://doi.org/10.1007/978-3-319-90306-4_171-1)
- 455 Pontieri, L., Rajakumar, A., Rafiqi, A.M. & Larsen, R.S. (2020) From egg to adult: a  
456 developmental table of the ant *Monomorium pharaonis*. bioRxiv.
- 457 <https://doi.org/10.1101/2020.12.22.423970>
- 458 R Core Team (2021) R: A Language and Environment for Statistical Computing. R  
459 Foundation for Statistical Computing, Vienna. Available from: [https://www.R-](https://www.R-project.org)  
460 [project.org](https://www.R-project.org) (accessed 31 October 2021).
- 461 Solis, D. R., Gonçalves Paterson Fox, E., Mayumi Kato, L., Massuretti de Jesus, C.,  
462 Teruyoshi Yabuki, A., Eugênia de Carvalho Campos, A. & Correa Bueno, O. (2010a)  
463 Morphological description of the immatures of the ant, *Monomorium floricola*. *Journal*  
464 *of insect science*, 10, 1–17.
- 465 <https://doi.org/10.1673/031.010.1501>
- 466 Solis, D.R., Fox, E.G.P., Rossi, M.L. & Bueno, O.C. (2010b) Description of the immatures of  
467 *Linepithema humile* Mayr (Hymenoptera: Formicidae). *Biological research* 43, 19–30.
- 468 <https://doi.org/10.4067/S0716-97602010000100004>
- 469 Schneider, C.A., Rasband, W.S. & Eliceiri, K.W. (2012) NIH Image to ImageJ: 25 years of  
470 image analysis. *Nature methods*, 9, 671–675.
- 471 <https://doi.org/10.1038/nmeth.2089>

- 472 Schultner, E., Oettler, J. & Helanterä, H. (2017) The role of brood in eusocial Hymenoptera.  
473 *The Quarterly review of biology*, 92, 39–78.  
474 <https://doi.org/10.1086/690840>
- 475 Shattuck, S.O. (1992) Generic revision of the ant subfamily Dolichoderinae. *Sociobiology*, 21,  
476 1–181.
- 477 Sparks, K.S., Andersen, A.N. & Austin, A.D. (2019) A multi-gene phylogeny of Australian  
478 *Monomorium* Mayr (Hymenoptera: Formicidae) results in reinterpretation of the genus  
479 and resurrection of *Chelaner* Emery. *Invertebrate systematics*, 33, 225–236.  
480 <https://doi.org/10.1071/IS16080>
- 481 Taylor, R. W. (1965) A monographic revision of the rare tropicopolitan ant genus  
482 *Probolomyrmex* Mayr (Hymenoptera: Formicidae). *Transactions of the Royal*  
483 *Entomological Society of London*, 117, 345–365.  
484 <https://doi.org/10.1111/j.1365-2311.1965.tb00044.x>
- 485 Taylor, R. W. (1967) A monographic revision of the ant genus *Ponera* Latreille  
486 (Hymenoptera: Formicidae). *Pacific Insects Monograph*, 13, 1–112.
- 487 Tribble, W. & Kronauer, D.J.C. (2017) Caste development and evolution in ants: it’s all about  
488 size. *The Journal of experimental biology*, 220, 53–62.  
489 <https://doi.org/10.1242/jeb.145292>
- 490 Villet, M.H., Hanrahan, S.A. & Walther, C. (1990) Larval structures associated with larva-to-  
491 adult trophallaxis in *Platythyrea* (Hymenoptera : Formicidae). *International Journal of*  
492 *Insect Morphology and Embryology*, 19, 243–256.  
493 [https://doi.org/10.1016/0020-7322\(90\)90010-M](https://doi.org/10.1016/0020-7322(90)90010-M)
- 494 Ward, P.S., Brady, S.G., Fisher, B.L. & Schultz, T.R. (2015) The evolution of myrmicine  
495 ants: Phylogeny and biogeography of a hyperdiverse ant clade (Hymenoptera:  
496 Formicidae). *Systematic entomology*, 40, 61–81.

- 497 <https://doi.org/10.1111/syen.12090>
- 498 Wetterer, J.K. (2010) Worldwide spread of the pharaoh ant, *Monomorium pharaonis*
- 499 (Hymenoptera: Formicidae). *Myrmecological News*, 13, 115–129.
- 500 Wetterer, J.K. (2010) Worldwide spread of the pharaoh ant, *Monomorium floricola*
- 501 (Hymenoptera: Formicidae). *Myrmecological News*, 13, 19-27.
- 502 Wheeler, G.C. & Wheeler, J. (1955) The Ant Larvae of the Myrmicine Tribe Solenopsidini.
- 503 *American Midland Naturalist*, 54, 119-141.
- 504 Wheeler, G.C. & Wheeler, J. (1966) The Ant Larvae of the Subfamily Dolichoderinae:
- 505 Supplement. *Annals of the Entomological Society of America*, 59, 726–732.
- 506 Wheeler, G.C. & Wheeler, J. (1971) Ant larvae of the subfamily Ponerinae: second
- 507 supplement. *Annals of the Entomological Society of America*, 64(6), 1197-1217.
- 508 Wheeler, G.C. & Wheeler, J. (1976) Ant larvae: review and synthesis. *Memoirs of the*
- 509 *Entomological Society of Washington*, 7, 1–108.
- 510 Wheeler, W.M. (1918) A study of some ant larvae, with a consideration of the origin and
- 511 meaning of the social habit among insects. *Proceedings of the American Philosophical*
- 512 *Society*, 57, 293–343.

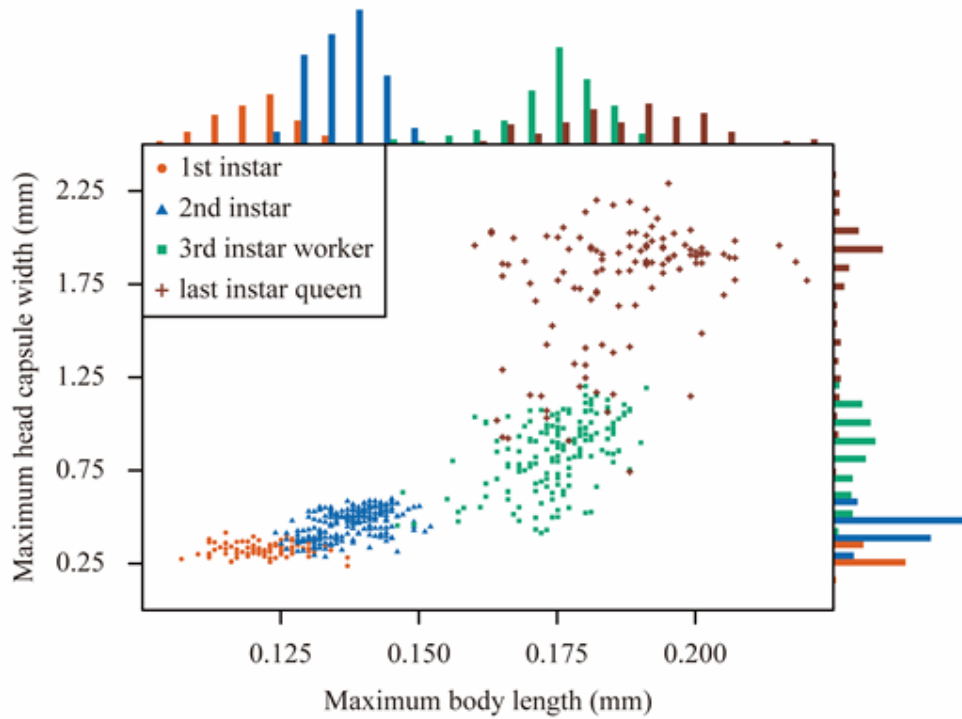

**FIGURE 1.** Relationship between the maximum head capsule width (mm) and the maximum body length (mm) of *Monomorium triviale* larvae. The 1st instar (orange circle,  $n = 84$ ), 2nd instar (blue triangle,  $n = 226$ ), 3rd instar worker (green square,  $n = 164$ ) and last instar queen (brown cross,  $n = 116$ ) larvae were determined by morphology and chaetotaxy. Histogram bin width of head capsule width and body length is 0.005 mm and 0.1 mm respectively.

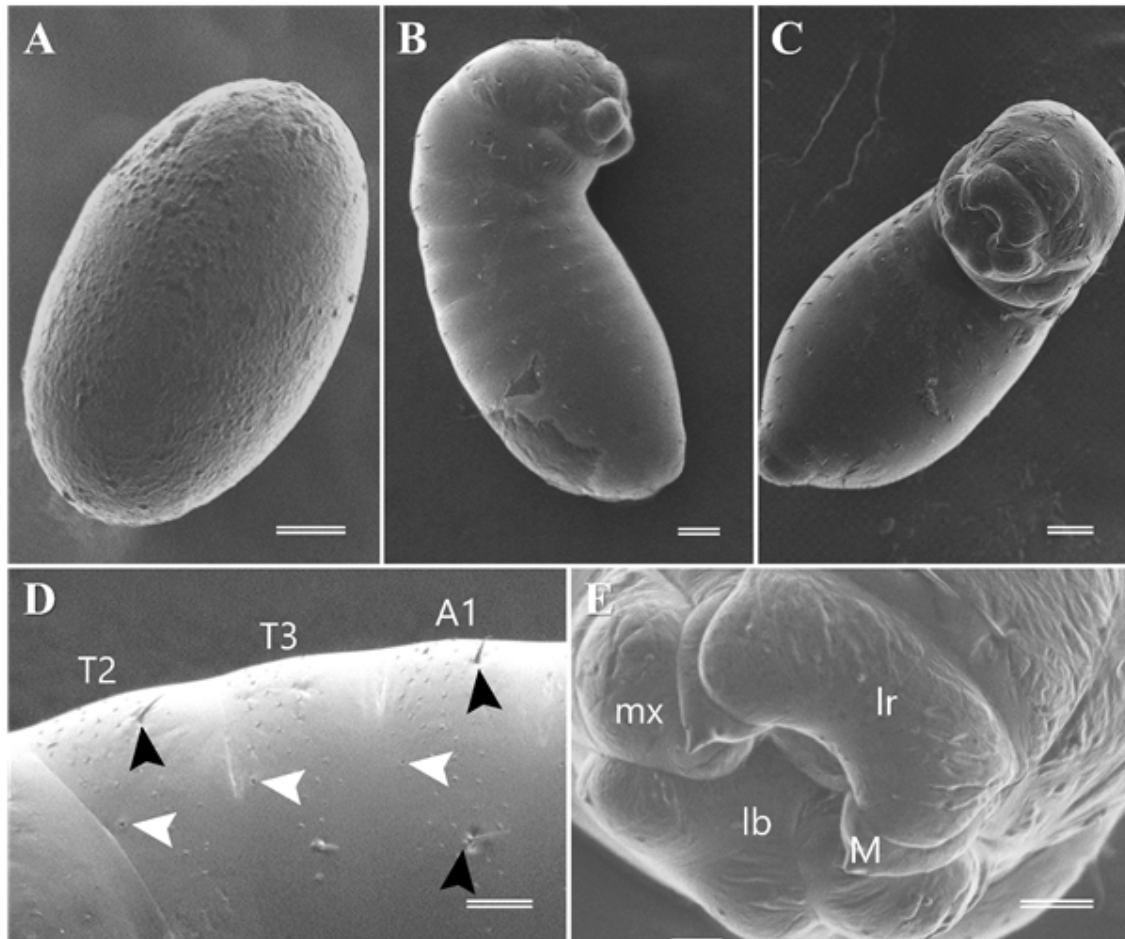

**FIGURE 2.** Egg and first instar larva of *Monomorium triviale*. **A.** side view of egg; **B.** habitus of first instar larva in lateral view; **C.** habitus of first instar larva in ventral view; **D.** lateral body surface of first instar larva, showing the spiracles (white arrowheads) and unbranched hairs (black arrowheads) on the thoracic (T2–T3) and abdominal (A1) segments; **E.** mouthparts of first instar larvae: labrum (lr), maxilla (mx), mandible (M) and labium (lb). Scale bars: 33.3  $\mu\text{m}$  (A, B, C); 14.2  $\mu\text{m}$  (D, E).



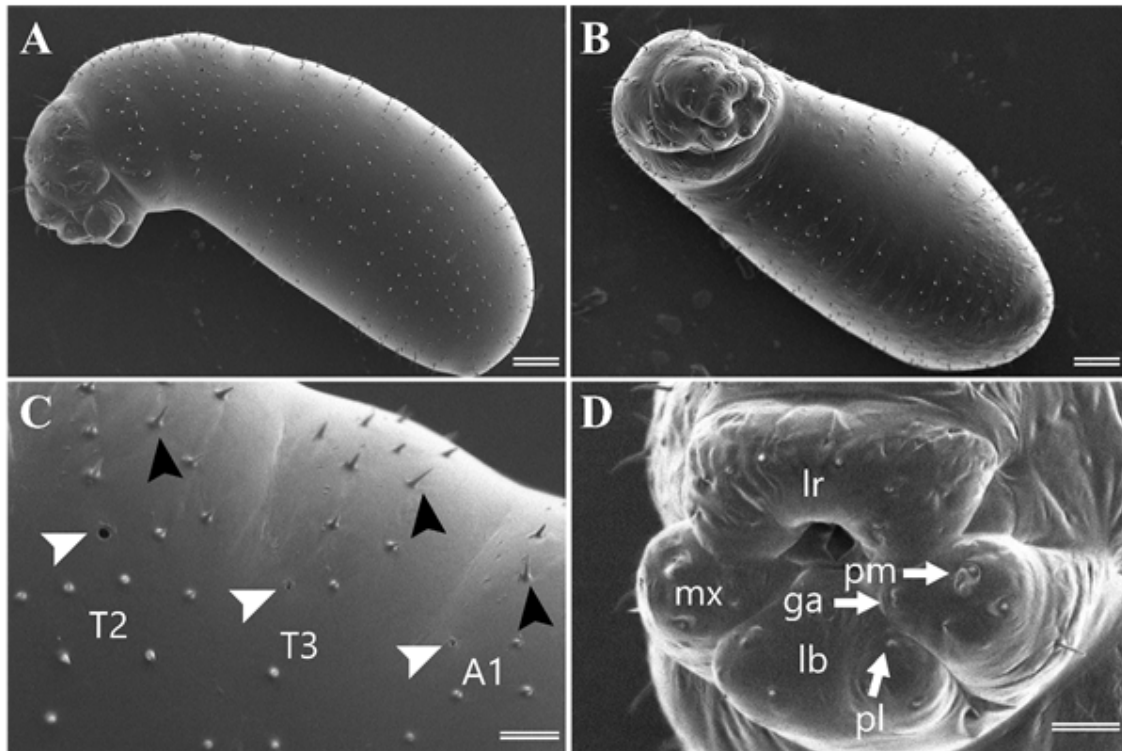

**FIGURE 3.** Second instar larva of *Monomorium triviale*. **A.** habitus in lateral view; **B.** habitus in ventral view; **C.** lateral body surface, showing the spiracles (white arrowheads) and unbranched hairs (black arrowheads) on the thoracic (T2–T3) and abdominal (A1) segments; **D.** mouthparts: labrum (lr), maxilla (mx), labium (lb), maxillary palp (pm) and labial palp (pl). Scale bars: 50  $\mu\text{m}$  (A, B); 14.2  $\mu\text{m}$  (C, D).

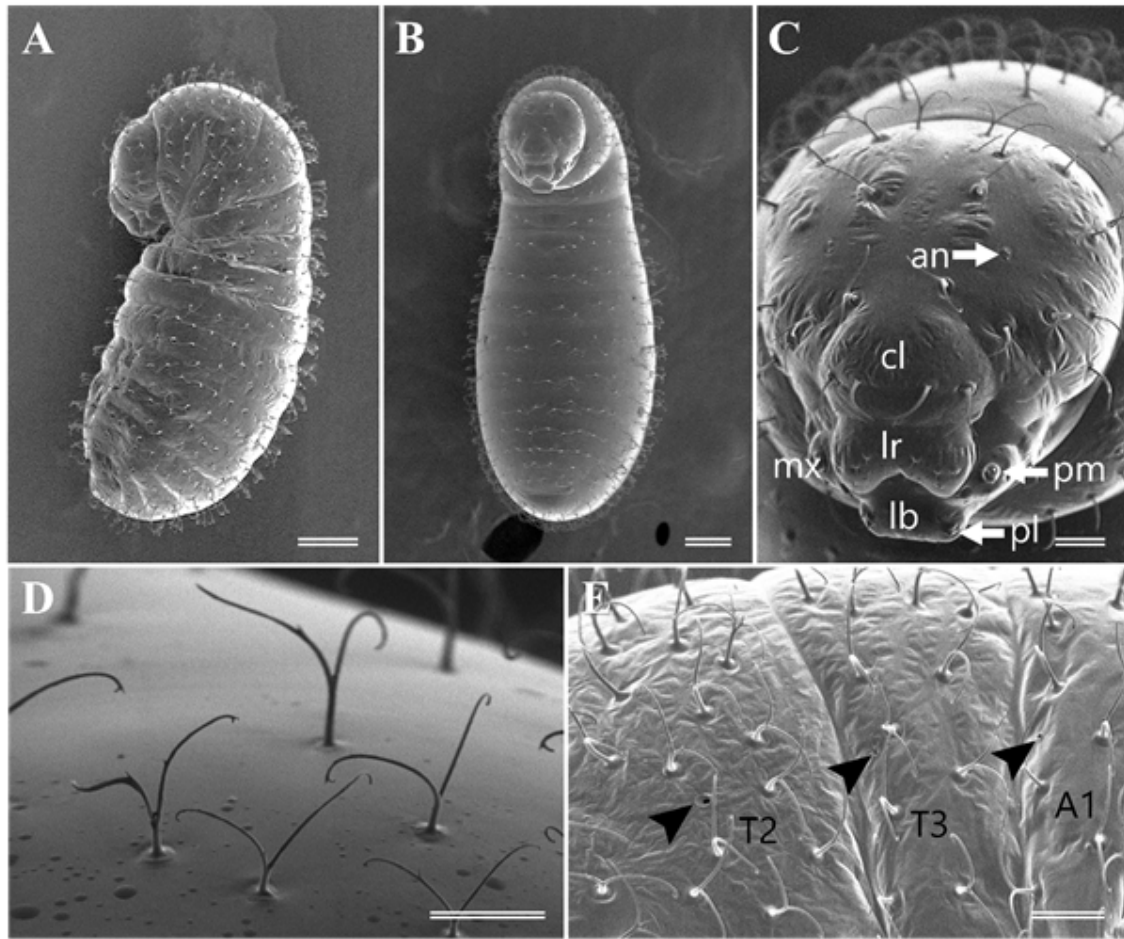

**FIGURE 4.** Third instar larva of *Monomorium triviale*. **A.** habitus in lateral view; **B.** habitus in ventral view; **C.** head and mouthparts: antenna (an), clypeus (cl), labrum (lr), maxilla (mx), labium (lb), maxillary palp (pm) and labial palp (pl); **D.** anchor-shaped body hairs on dorsal thoracic somite; **E.** lateral body surface, showing the spiracles (black arrowheads) on the thoracic (T2–T3) and abdominal (A1) segments. Scale bars: 100  $\mu\text{m}$  (A, B); 25  $\mu\text{m}$  (C, D, E).

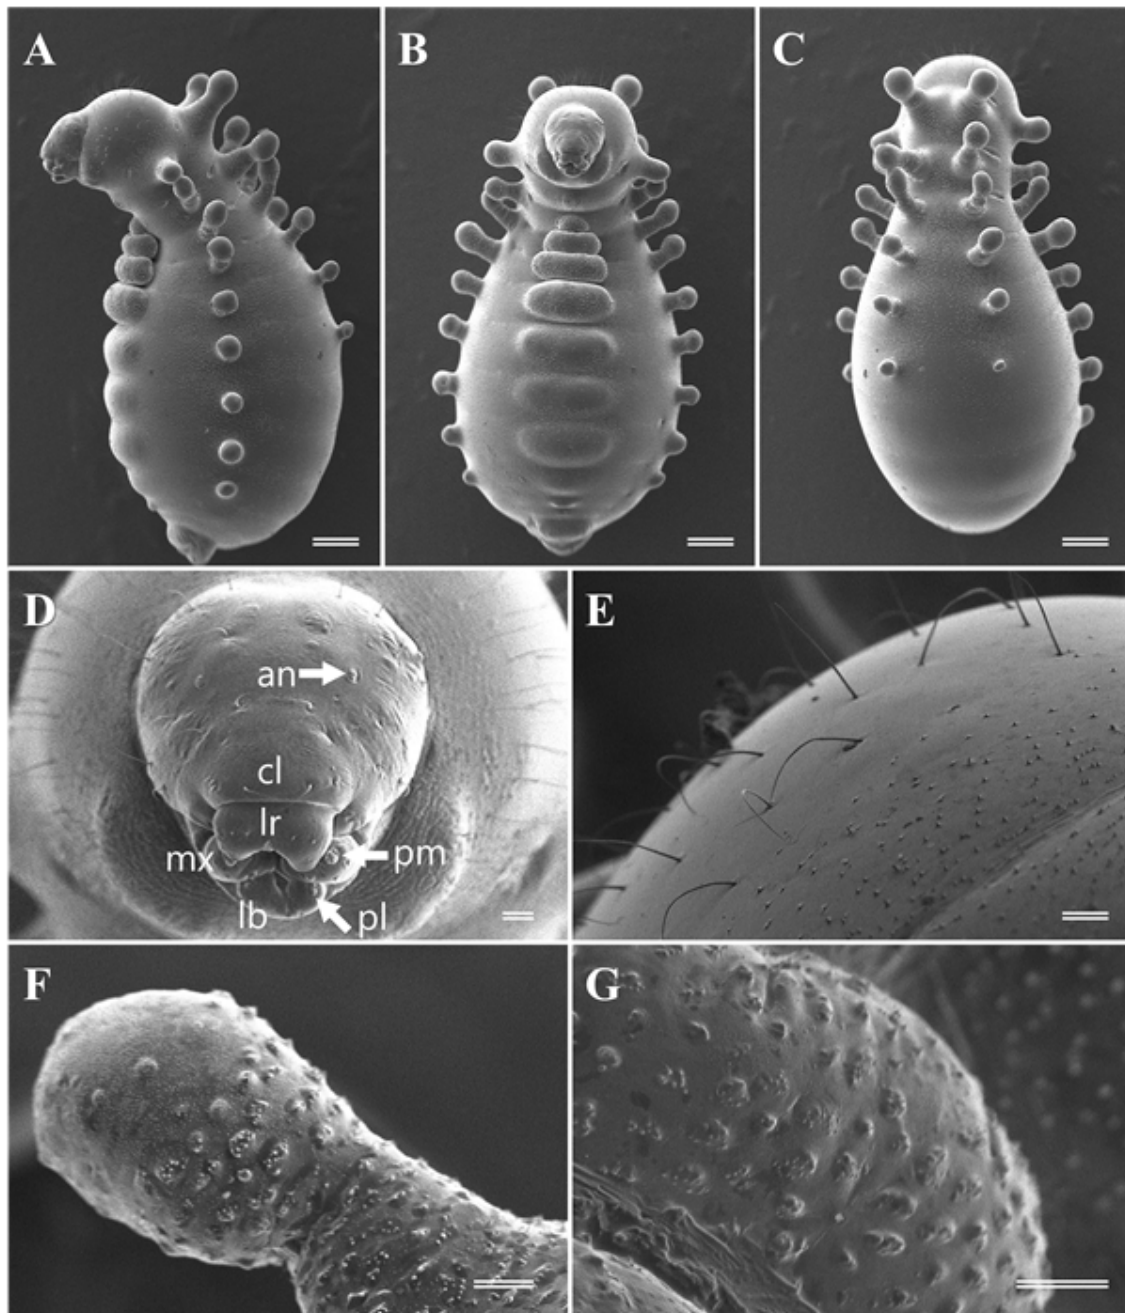

**FIGURE 5.** Last instar larva of *Monomorium triviale* queen. **A.** habitus in lateral view; **B.** habitus in ventral view; **C.** habitus in dorsal view; **D.** head and mouthparts: antenna (an), clypeus (cl), labrum (lr), maxilla (mx), labium (lb), maxillary palp (pm) and labial palp (pl); **E.** body hairs; **F.** doorknob-like tubercle; **G.** mid-ventral boss. Scale bars: 142  $\mu\text{m}$  (A, B, C); 20  $\mu\text{m}$  (D, E, F, G).

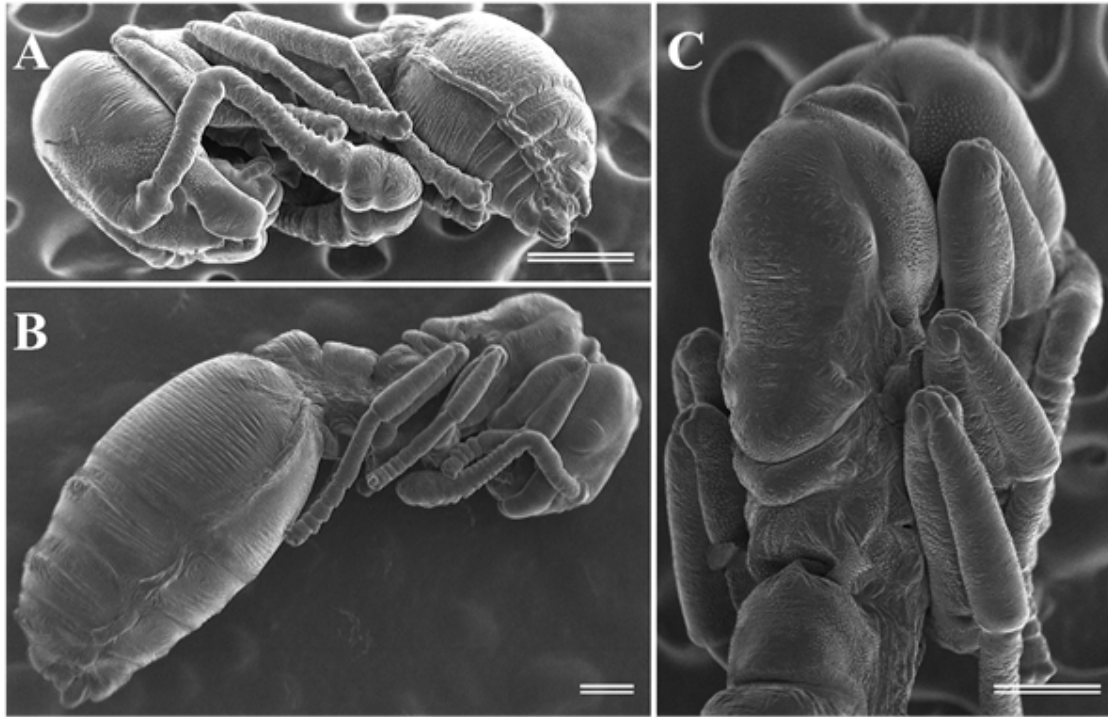

**FIGURE 6.** Pupae of *Monomorium triviale*. **A.** habitus of worker pupa in lateral view; **B.** habitus of queen pupa in lateral view; **C.** thorax of queen pupa in dorsal view. All scale bars = 200  $\mu\text{m}$ .

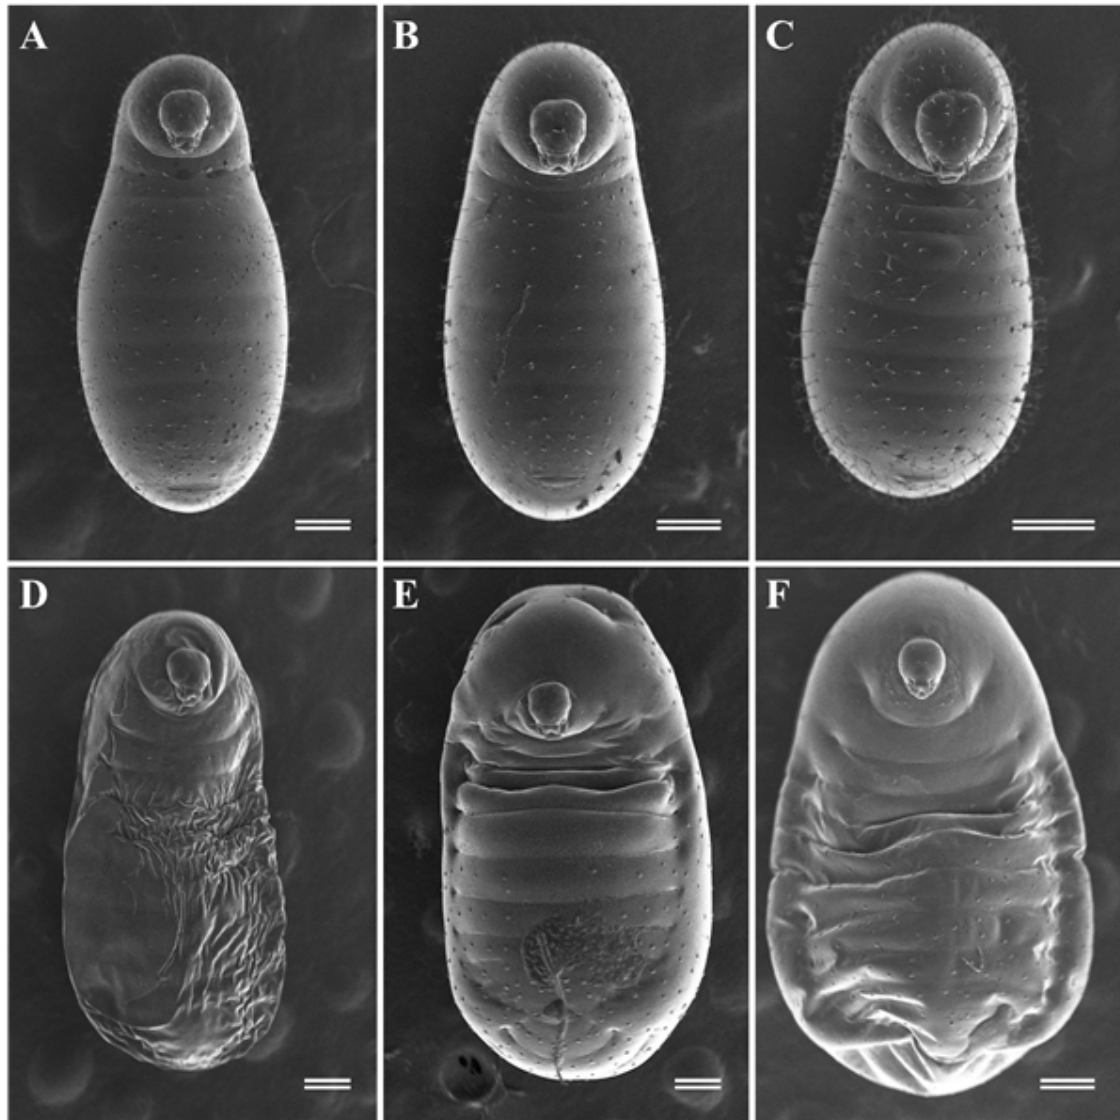

**FIGURE 7.** Habitus of last instar *Monomorium* larvae in ventral view. **A.** *M. hiten* worker; **B.** *M. intrudens* worker; **C.** *M. chinense* worker; **D.** *M. hiten* reproductive; **E.** *M. intrudens* reproductive; **F.** *M. chinense* reproductive. All scale bars = 200  $\mu$ m.

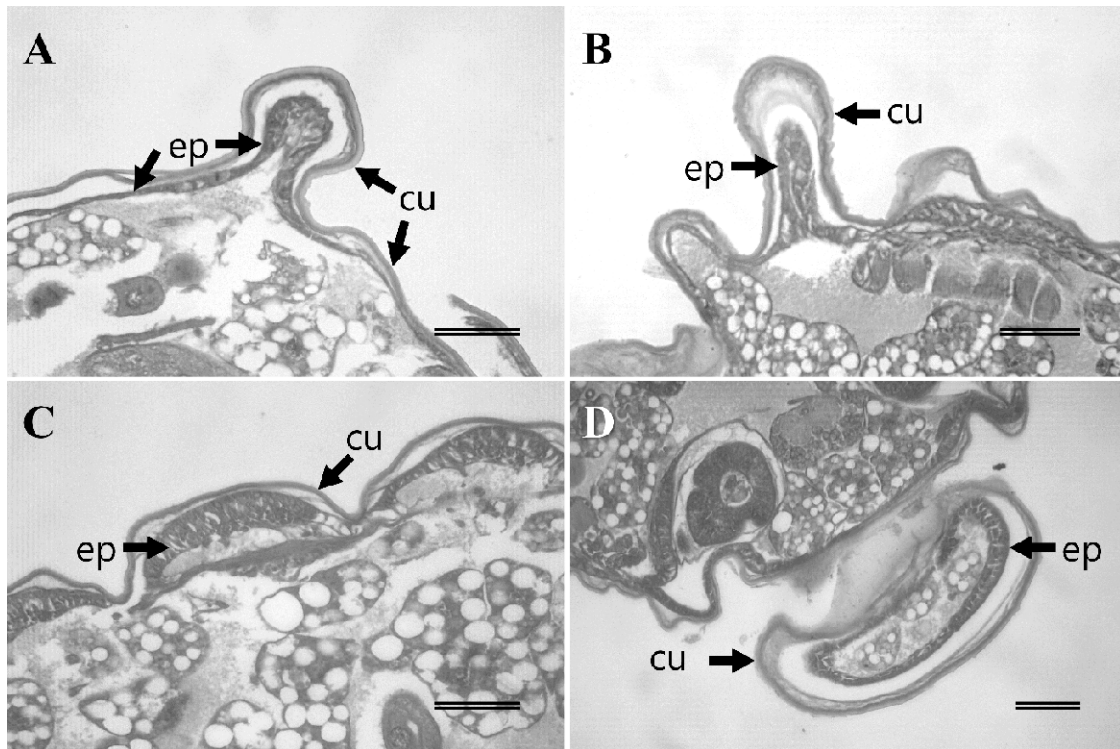

**FIGURE 8.** Histological section through the protuberances of last instar queen larvae, showing epidermis (ep) and cuticle (cu). **A.** cross section of dorsal doorknob-like tubercles; **B.** cross section of lateral doorknob-like tubercles; **C.** longitudinal section of mid-ventral bosses; **D.** cross section of mid-ventral bosses. All scale bars = 50  $\mu\text{m}$ .

**Table 1.** Morphological and chaetotaxical characteristics in different castes and instars of *M. triviale*.

| <b>Larval instar</b>     | <b>Head width (mm)</b>         | <b>Body length (mm)</b>        | <b>Hair number</b> | <b>Hair type</b> | <b>Protuberances</b> |
|--------------------------|--------------------------------|--------------------------------|--------------------|------------------|----------------------|
| <b>1st instar</b>        | 0.122 ± 0.006<br>(0.107–0.137) | 0.328 ± 0.036<br>(0.237–0.416) | 100–150            | simple smooth    | absent               |
| <b>2nd instar</b>        | 0.137 ± 0.006<br>(0.124–0.152) | 0.459 ± 0.074<br>(0.281–0.593) | 500–600            | simple smooth    | absent               |
| <b>3rd instar worker</b> | 0.175 ± 0.008<br>(0.146–0.191) | 0.847 ± 0.192<br>(0.414–1.20)  | 400–500            | anchor-tipped    | absent               |
| <b>Last instar queen</b> | 0.187 ± 0.013<br>(0.16–0.220)  | 1.756 ± 0.329<br>(0.742–2.291) | almost hairless    | simple smooth    | present              |

**TABLE 2.** Protuberances position and size in the last instar queen larvae of *Monomorium triviale*.

| Somites      | Lateral tubercle size<br>( $\mu\text{m}$ ) |         | Dorsal tubercle size<br>( $\mu\text{m}$ ) |         | Ventral boss size ( $\mu\text{m}$ ) |         |            |
|--------------|--------------------------------------------|---------|-------------------------------------------|---------|-------------------------------------|---------|------------|
|              | diameter                                   | length  | diameter                                  | length  | width                               | length  | height     |
| Thoracic 1   | -                                          | -       | -                                         | -       | -                                   | -       | -          |
| Thoracic 2   | 61-76                                      | 116-141 | 80-95                                     | 184-210 | -                                   | -       | -          |
| Thoracic 3   | 77-87                                      | 102-120 | 67-82                                     | 160-210 | 101-217                             | 52-75   | 43-79      |
| Abdominal 1  | 60-86                                      | 130-161 | 70-73                                     | 135-173 | 181-277                             | 66-109  | 116-122    |
| Abdominal 2  | 66-93                                      | 119-168 | 69-73                                     | 113-135 | 238-349                             | 89-138  | 123-152    |
| Abdominal 3  | 68-92                                      | 107-127 | 62-69                                     | 82-95   | 293-430                             | 134-180 | 137-159    |
| Abdominal 4  | 73-82                                      | 92-111  | 59-67                                     | 46-65   | -                                   | -       | indistinct |
| Abdominal 5  | 66-81                                      | 79-90   | -                                         | -       | -                                   | -       | indistinct |
| Abdominal 6  | 55-75                                      | 54-70   | -                                         | -       | -                                   | -       | indistinct |
| Abdominal 7  | 55-66                                      | 38-58   | -                                         | -       | -                                   | -       | -          |
| Abdominal 8  | -                                          | -       | -                                         | -       | -                                   | -       | -          |
| Abdominal 9  | -                                          | -       | -                                         | -       | -                                   | -       | -          |
| Abdominal 10 | -                                          | -       | -                                         | -       | -                                   | -       | -          |



**TABLE 3.** The developmental periods of the immature stages of *M. triviale* and the number of observed individuals for each stage.

| Developmental stage | Source nests | The numbers of individuals |                        |                      | Developmental period (day) |       |
|---------------------|--------------|----------------------------|------------------------|----------------------|----------------------------|-------|
|                     |              | Total observed             | Turned to target stage | Molted to next stage | mean $\pm$ SD              | range |
| Egg                 | 18           | NA                         | 211                    | 166                  | 13.39 $\pm$ 2.28           | 8-22  |
| Young larva         | 7            | 70                         | 32                     | 32                   | 7.31 $\pm$ 1.00            | 6-9   |
| Old larva           | 8            | 80                         | 72                     | 51                   | 18.31 $\pm$ 3.29           | 13-26 |
| Prepupa             | 8            | 51                         | 51                     | 51                   | 4.43 $\pm$ 1.10            | 1-7   |
| Pupa                | 7            | 70                         | 33                     | 23                   | 16.87 $\pm$ 1.55           | 13-20 |

**TABLE 4.** The list of previously reported unusual larval structures. references cited: 1, Masuko 1989; 2, Masuko 2019; 3, Taylor 1965; 4, Wheeler 1918; 5, Villet *et al.* 1990; 6, Petralia & Vinson; 1979; 7, Taylor 1967; 8, Wheeler & Wheeler 1971; 9, Peeters & Hölldobler 1992; 10, Fox *et al.* 2017; 11, Wheeler & Wheeler 1966; 12, Shattuck 1992; 13, Solis *et al.* 2010b; 14, Eidmann 1926; 15, Menozzi 1930; 16, Casevitz-Weulersse 1984.

| Subfamily               | Segment                | Position | Structure                    | Caste  | Instar | Function               | Genera                                                               | References  |
|-------------------------|------------------------|----------|------------------------------|--------|--------|------------------------|----------------------------------------------------------------------|-------------|
| <b>Leptanillinae</b>    | abdominal              | dorsal   | duct-like opening            | -      | last   | trophallaxis           | <i>Leptanilla</i>                                                    | 1           |
| <b>Proceratiinae</b>    | abdominal              | dorsal   | slit-like openings           | -      | last   | trophallaxis           | <i>Proceratium</i>                                                   | 2           |
|                         |                        | posterod | sucker-like                  | -      | -      | attachment             | <i>Probolomyrmex</i>                                                 | 3           |
|                         |                        | orsal    | appendage                    |        |        |                        |                                                                      |             |
| <b>Pseudomyrmecinae</b> | thoracic,<br>abdominal | ventral  | large protuberance           | -      | all    | trophallaxis           | <i>Tetraponera</i>                                                   | 4           |
| <b>Ponerinae</b>        | abdominal              | ventral  | single conical<br>tubercle   | worker | late   | trophallaxis           | <i>Platythyrea</i>                                                   | 5           |
|                         |                        |          | protuberances                | -      | -      | food<br>holding        | Odontomachus, Pachycondyla,<br>Leptogenys                            | 6           |
|                         |                        | dorsal   | paired doorknob<br>tubercles | -      | varies | support,<br>attachment | <i>Brachyponera, Cryptopone,</i><br><i>Hypoponera, Odontomachus,</i> | 7, 8, 9, 10 |
|                         |                        |          |                              |        |        |                        |                                                                      |             |

|                       |                     |                 |                            |        |      |   |                                                          |            |
|-----------------------|---------------------|-----------------|----------------------------|--------|------|---|----------------------------------------------------------|------------|
|                       |                     |                 |                            |        |      |   | <i>Ponera, Myopias, Simopelta,</i><br><i>Belonopelta</i> |            |
| <b>Dolichoderinae</b> | abdominal           | dorsal          | no-paired tubercles        | worker | all  | - | <i>Froggattella</i>                                      | 11, 12     |
|                       |                     |                 | single tubercle            | worker | all  | - | <i>Linepithema</i>                                       | 12, 13     |
|                       | abdominal           | posterodorsal   | single tubercle            | worker | -    | - | <i>Tapinoma</i>                                          | 11, 12     |
|                       |                     | lateral         | well-developed dilatations | queen? | late | - | <i>Crematogaster</i>                                     | 14, 15, 16 |
| <b>Myrmecinae</b>     | thoracic, abdominal | lateral, dorsal | doorknob-like tubercles    | queen  | last | - | <i>Monomorium</i>                                        | This study |
|                       | thoracic, abdominal | ventral         | boss-shaped protuberances  | queen  | last | - | <i>Monomorium</i>                                        | This study |
|                       |                     |                 |                            |        |      |   |                                                          |            |
